# Supplementary material
Source: PubMed Central journal article supplement (PMC2846459)
Supplement: NIHMS179215-supplement-179215.pdf [file NIHMS179215-supplement-179215.pdf]

**A Dual-Emissive-Materials Design Concept Enables Tumour Hypoxia Imaging**Guoqing Zhang,<sup>1</sup> Gregory M. Palmer,<sup>2</sup> Mark W. Dewhirst,<sup>2</sup> and Cassandra L. Fraser<sup>1\*</sup><sup>1</sup>Department of Chemistry, University of Virginia, Charlottesville, VA 22904, USA  
[fraser@virginia.edu](mailto:fraser@virginia.edu)<sup>2</sup>Department of Radiation Oncology, Duke University Medical Center, Durham, NC 27710,  
USA

**Materials and Methods.** 3,6-Dimethyl-1,4-dioxane-2,5-dione (D,L-lactide, Aldrich) was recrystallized twice from ethyl acetate and stored under nitrogen. Solvents, CH<sub>2</sub>Cl<sub>2</sub> and THF, were dried and purified by passage through alumina columns. Tin(II) 2-ethylhexanoate (Sn(oct)<sub>2</sub>, Spectrum), boron trifluoride diethyl etherate (Aldrich, purified, redistilled) and all other reagents and solvents were used as received without further purification. <sup>1</sup>H NMR (300 MHz) spectra were recorded on a UnityInova 300/51 instrument and referenced to the signal for residual protio chloroform at 7.26 ppm.

**Dbm(I)OH** A suspension of sodium hydride (36 mg, 1.5 mmol) and THF (~40 mL) was prepared in a 100 mL, dried Schlenk flask. The NaH suspension was transferred to a 100 mL 2-neck round-bottom flask containing 1-{4-[2-(tetrahydropyran-2-yloxy)-ethoxy]-phenyl}-ethanone<sup>1</sup> (200 mg, 0.76 mmol) and methyl p-iodobenzoate (200 mg, 0.76 mmol) via cannula. The resulting reaction mixture was heated at reflux for 4 h, cooled to room temperature, and then further cooled in an ice bath. The reaction was quenched by the dropwise addition of a saturated aqueous solution of sodium bicarbonate (5 mL) and then

acidified (pH~3) by the addition of 3M HCl. THF was then removed *in vacuo* and the remaining aqueous layer was extracted with ethyl acetate (2 × 100 mL). The combined organic layer was dried over sodium sulfate, and concentrated *in vacuo* to give a brown, oily residue. The residue was dissolved in THF (50 mL) and water (15 mL) in the presence of 15 mg TsOH as catalyst and was heated at 55 °C for 18 h. The reaction mixture was concentrated *in vacuo* at 30 °C to remove THF, the white solid in aqueous layer was then collected by filtrated and thoroughly washed by water. The crude material was purified by column chromatography (1:1 EtOAc/Hex) to provide the desired product as white/silvery flaky crystals: 142.3 g (46 %) <sup>1</sup>H NMR δ 16.90 (s, 1H, enol OH), 7.98 (d, *J* = 9.0, 2H, 2',6'-ArH), 7.84 (d, *J* = 8.8, 2H, 2'',6''-ArH), 7.68 (d, *J* = 8.8, 1H, 3', 5'-ArH), 7.01 (d, *J* = 8.9, 1H, 3'', 5''-ArH), 6.75 (s, 1H, COCHCO), 4.17 (t, *J* = 4.4, 2H, HOCH<sub>2</sub>CH<sub>2</sub>OAr), 4.02 (m, 2H, HOCH<sub>2</sub>CH<sub>2</sub>OAr), 1.96 (t, *J* = 6.3, HOCH<sub>2</sub>CH<sub>2</sub>OAr), Anal. Calcd for C<sub>17</sub>H<sub>15</sub>IO<sub>4</sub>: C, 49.78; H, 3.69. Found: C, 49.98; H, 3.60. UV/vis (CH<sub>2</sub>Cl<sub>2</sub>): λ<sub>max</sub> = 360 nm, ε<sub>max</sub> = 35,000 M<sup>-1</sup>cm<sup>-1</sup>.

**BF<sub>2</sub>dbm(I)OH (1)** Dbm(I)OH (125.0 mg, 0.305 mmol) was added to a flame-dried 2-neck round bottom flask under nitrogen, and dissolved in a mixture solvent of THF/CH<sub>2</sub>Cl<sub>2</sub> (5/15 mL) to give a colorless solution. Boron trifluoride diethyl etherate (72 μL, 0.710 mmol) was added via syringe and the solution turned bright yellow. The flask was equipped with a reflux condenser and heated in an oil bath at 60 °C (15 h). The solution was then cooled to room temperature, and then the solvent was removed *on vacuo*, resulting in a yellow solid. The crude material was purified by column chromatography (1:1 EtOAc/Hex) followed by recrystallization in acetone/hexanes to give BF<sub>2</sub>dbm(I)OH as dark yellow fine crystals:

106.3 mg (73%). m.p. 262-264 °C.  $^1\text{H}$  NMR ( $\text{CDCl}_3$ )  $\delta$  8.17 (d, 2H,  $J = 8.9$ , 2',6'-ArH), 7.92 (d, 2H,  $J = 8.6$ , 2'',6''-ArH), 7.82 (d, 2H,  $J = 8.8$ , 3'', 5''-ArH), 7.07 (d,  $J = 8.8$ , 2H, 3',5'-ArH), 7.06 (s, 1H, COCHCO), 4.23 (t,  $J = 4.7$ , 2H,  $\text{HOCH}_2\text{CH}_2\text{OAr}$ ), 4.04 (m, 2H,  $\text{HOCH}_2\text{CH}_2\text{OAr}$ ), 1.94 (t,  $J = 6.3$ ,  $\text{HOCH}_2\text{CH}_2\text{OAr}$ ). HRMS Calcd for  $\text{C}_{17}\text{H}_{14}\text{BO}_4\text{F}_2\text{Cl}$  ( $\text{M}+\text{Cl}$ ): 492.9692; Found: 492.9707; UV/vis ( $\text{CH}_2\text{Cl}_2$ ):  $\lambda_{\text{max}} = 407$  nm,  $\epsilon_{\text{max}} = 57,900$   $\text{M}^{-1}\text{cm}^{-1}$ .

**BF<sub>2</sub>dbm(I)PLA.** A representative preparation for **P1** is as follows: BF<sub>2</sub>dbm(I)OH (**1**) (22.8 mg, 0.05 mmol), lactide (0.360 g, 2.5 mmol) and Sn(oct)<sub>2</sub> (0.4 mg, 1.0  $\mu\text{mol}$ ) (loading: 1:50:1/50) in hexanes were combined in a sealed Kontes flask under N<sub>2</sub>. The entire bulb of the flask was submerged in a 130 °C oil bath for 30 min. Crude polymer was purified by precipitation from  $\text{CH}_2\text{Cl}_2$ /cold MeOH. The polymer was collected by centrifugation, the filtrate was decanted, and the rubbery solid was washed with additional cold MeOH (2 $\times$ ). The resulting solid was reprecipitated from  $\text{CH}_2\text{Cl}_2$ /hexanes, collected by centrifugation, washed with hexanes, and dried *in vacuo* to give a yellow foam: 206 mg (78%, corrected for 64% monomer conversion).  $M_n$  (GPC/RI) = 2,700, PDI = 1.11;  $M_n$  (NMR) = 4,000.  $^1\text{H}$  NMR ( $\text{CDCl}_3$ )  $\delta$   $^1\text{H}$  NMR ( $\text{CDCl}_3$ ) 8.16 (d, 2H,  $J = 8.9$ , 2',6'-ArH), 7.92 (d, 2H,  $J = 8.8$ , 2'',6''-ArH), 7.82 (d, 2H,  $J = 8.6$ , 3'', 5''-ArH), 7.08 (s, 1H, COCHCO), 7.04 (d,  $J = 8.9$ , 2H, 3',5'-ArH), 5.12-5.30 (m, broad, 50 H, PLA CH), 4.55 (m, 2H,  $\text{CH}_2\text{CH}_2\text{OAr}$ ), 4.32 (m, 2H,  $\text{CH}_2\text{CH}_2\text{OAr}$ ), 2.69 (q, 1H, PLA OH), 1.54-1.60 (m, broad, 150 H, PLA CH<sub>3</sub>). UV/vis ( $\text{CH}_2\text{Cl}_2$ ):  $\lambda_{\text{max}} = 406$  nm,  $\epsilon = 33,400$   $\text{M}^{-1}\text{cm}^{-1}$ ,  $\lambda = 320$  nm,  $\epsilon = 6280$   $\text{M}^{-1}\text{cm}^{-1}$ . Reaction and molecular weight data for **P1-P3** are shown in Table S1.

**Table S1.** Polymerization and Molecular Weight Data for **P1-P3**

|           | Loading <sup>a</sup> | Time <sup>b</sup><br>(h) | $M_n$ (GPC)/PDI <sup>c</sup> | $M_n$ (NMR) | Conversion <sup>d</sup><br>(%) | Yield <sup>e</sup><br>(%) |
|-----------|----------------------|--------------------------|------------------------------|-------------|--------------------------------|---------------------------|
| <b>P1</b> | 1:50                 | 0.5                      | 2,700/1.11                   | 4,000       | 64                             | 78                        |
| <b>P2</b> | 1:100                | 1                        | 7,300/1.15                   | 7,000       | 73                             | 84                        |
| <b>P3</b> | 1:300                | 3                        | 17,600/1.17                  | 21,700      | 55                             | 66                        |

a. Molar ratio of initiator to monomer

b. Polymerization was stopped after this time

c. Polydispersity index (PDI) =  $M_w/M_n$

d. Percent monomer consumption

e. Polymer product yield corrected for unreacted monomer

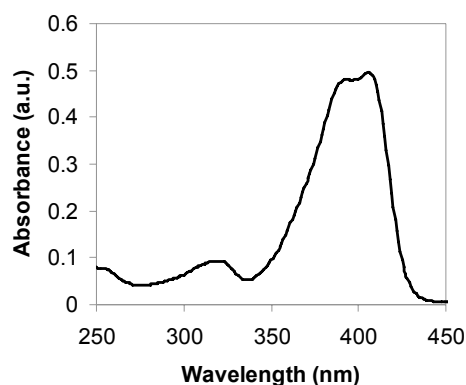

**Figure S1** Absorption spectrum of BF<sub>2</sub>dbm(I)PLA (**1**) in CH<sub>2</sub>Cl<sub>2</sub>.

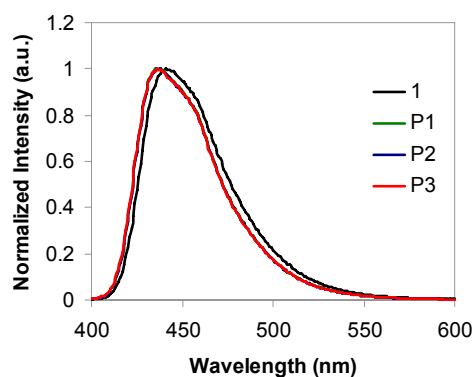

**Figure S2.** Emission spectra of BF<sub>2</sub>dbm(I)OH (**1**) and BF<sub>2</sub>bm(I)PLA (**P1-P3**) in CH<sub>2</sub>Cl<sub>2</sub>.

(Note: Spectra for **P1-P3** overlap.)

**Table S2.** RTP Lifetime Data for Polymer Powders Under Air<sup>a</sup>

|           | $M_n$ (Da) | $\tau_{\text{RTP}}(\text{ms})^b$ |
|-----------|------------|----------------------------------|
| <b>P1</b> | 2,700      | 0.42                             |
| <b>P2</b> | 7,300      | 0.55                             |
| <b>P3</b> | 17,600     | 0.57                             |

a. 21% oxygen content

b. Excitation source: xenon flash lamp at 405 nm; pre-exponential weighted lifetime fit to triple exponential decay

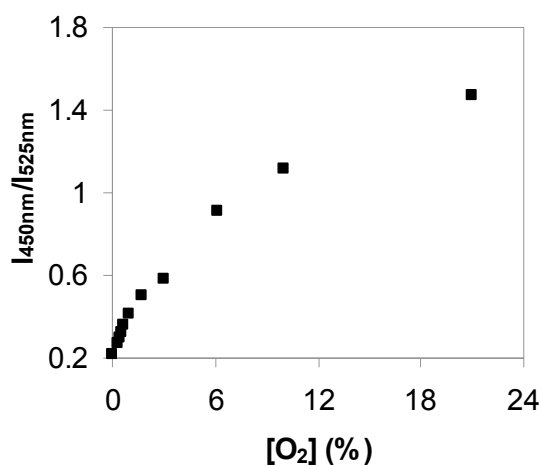**Figure S3.** Oxygen sensitivity calibration for the **P1** film. Relationship between the O<sub>2</sub> level (0-21%) and the F/P emission intensity ratio at two fixed wavelengths (450 nm and 525 nm).

**BF<sub>2</sub>dbm(I)PLA Nanoparticles.** **P2** nanoparticles were fabricated as previously reported<sup>2</sup>. Briefly, BF<sub>2</sub>dbm(I)PLA (**P2**, 25 mg) was dissolved in DMF (2.5 mL). The solution was added dropwise to distilled H<sub>2</sub>O (25 mL) with stirring. Samples were dialyzed against distilled H<sub>2</sub>O with replacement of fresh water every hour for six hours before dialyzing overnight. On the following day, distilled H<sub>2</sub>O was replaced again and samples were

dialyzed for an additional hour. The suspension was subsequently passed through filter paper (VWR Filter Paper Qualitative Grade: 413), and transferred to vials for storage. Nanoparticle sizes were determined by dynamic light scattering (DLS) (90° angle) on the Photocor Complex (Photocor Instruments Inc., USA) equipped with a He–Ne laser (Coherent, USA, Model 31–2082, 632.8 nm, 10 mW). Size and polydispersity analysis were performed using DynaLS software (Alango, Israel). Data for **P2** nanoparticles are given in Table S3.

**Table S3.** Characterization of **P2** nanoparticles.

| $M_n^a$<br>(Da) | PDI <sup>b</sup> | Diameter <sup>c</sup><br>(nm) | PD <sup>c,d</sup> | $\lambda_F^e$<br>(nm) | $\tau_F^f$<br>(ns) | $\lambda_{RTP}^g$<br>(nm) | $\tau_P^h$<br>(ms) |
|-----------------|------------------|-------------------------------|-------------------|-----------------------|--------------------|---------------------------|--------------------|
| 7,300           | 1.15             | 98                            | 0.04              | 450                   | 0.45               | 528                       | 4.82               |

- Determined by GPC in THF vs polystyrene standards
- GPC PDI = polydispersity index
- Determined by dynamic light scattering (DLS)
- PD = polydispersity
- Excitation source: 369 nm light emitting diode; fluorescence emission maximum for aqueous nanoparticle suspension ( $\lambda_{max}$  absorption = 406 nm)
- Fluorescence lifetime fit to triple exponential decay
- Room temperature phosphorescence emission maximum for aqueous nanoparticle suspension purged with N<sub>2</sub>
- Excitation source: xenon flash lamp at 405 nm; pre-exponential weighted phosphorescence lifetime under N<sub>2</sub> fit to triple exponential decay

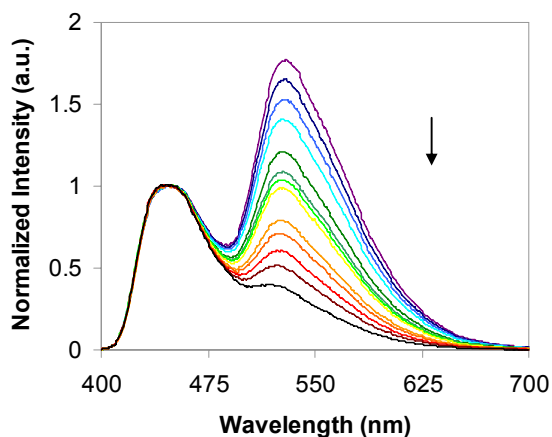

**Figure S4.** Emission spectra of **P2** boron nanoparticles in aqueous suspension under increasing O<sub>2</sub> levels (0-21%, indicated by the arrow) normalized to the fluorescence band.

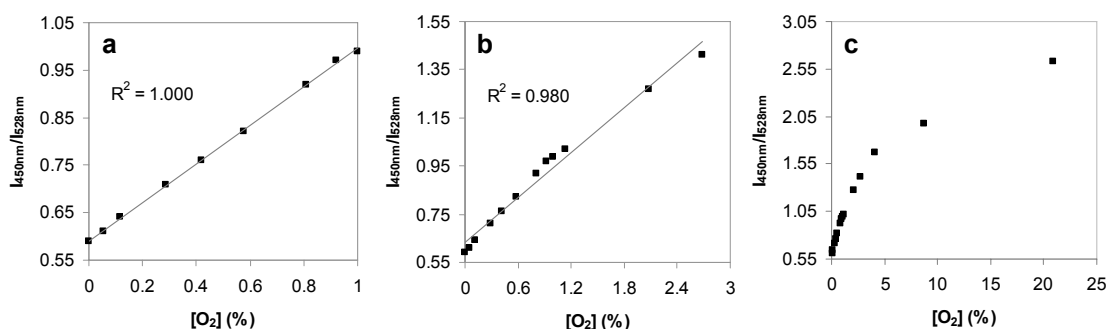

**Figure S5.** Oxygen sensitivity calibration for **P2** nanoparticles. Relationship between the O<sub>2</sub> level and the F/P emission intensity ratio at two fixed wavelengths (450 nm and 528 nm). Different oxygen concentration ranges shown for comparison: **a**, linear between 0-1%; **b**, reasonably linear up to 3%; **c**, more significant curvature approaching ambient level (21%).

1. Bender, J. L. et al. Site-isolated luminescent europium complexes with polyester macroligands: Metal-centered heteroarm stars and nanoscale assemblies with labile block junctions. *J. Am. Chem. Soc.* **124**, 8526-8527 (2002).
2. Pfister, A., Zhang, G., Zareno, J., Horwitz, A. F. & Fraser, C. L. Boron polylactide nanoparticles exhibiting fluorescence and phosphorescence in aqueous medium. *ACS Nano* **2**, 1252-1258 (2008).
